# Supplementary material for: Environmental Effects on Hysteresis of Transfer Characteristics in Molybdenum Disulfide Field-Effect Transistors
Source: PubMed Central journal article supplement (PMC4951808; doi:10.1038/srep30084), 2016-07-20
Supplement: srep30084-s1.pdf [file srep30084-s1.pdf]

Supplementary Information

**Environmental Effects on Hysteresis of Transfer Characteristics in Molybdenum Disulfide Field-Effect Transistors**

Yoshihiro Shimazu, Mitsuki Tashiro, Satoshi Sonobe, and Masaki Takahashi

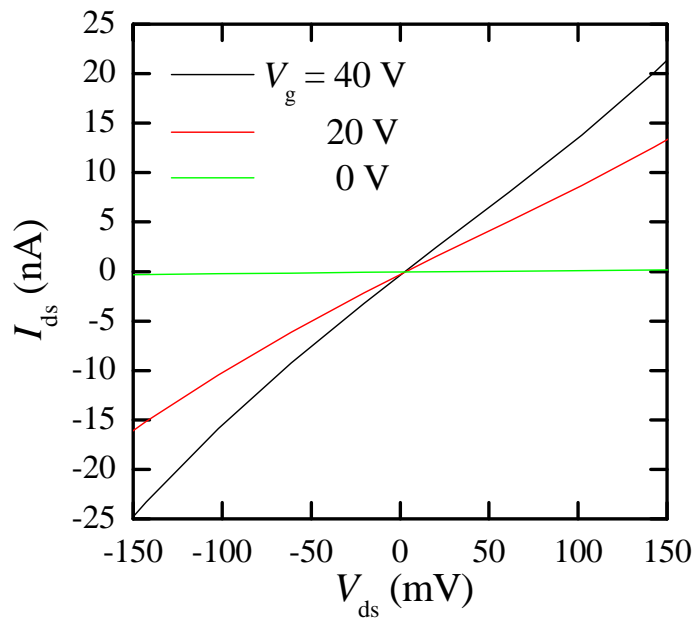

**Figure S1.**  $I_{\text{ds}}-V_{\text{ds}}$  curves for  $V_{\text{g}} = 0, 20$  and  $40$  V. Ohmic characteristics are observed.

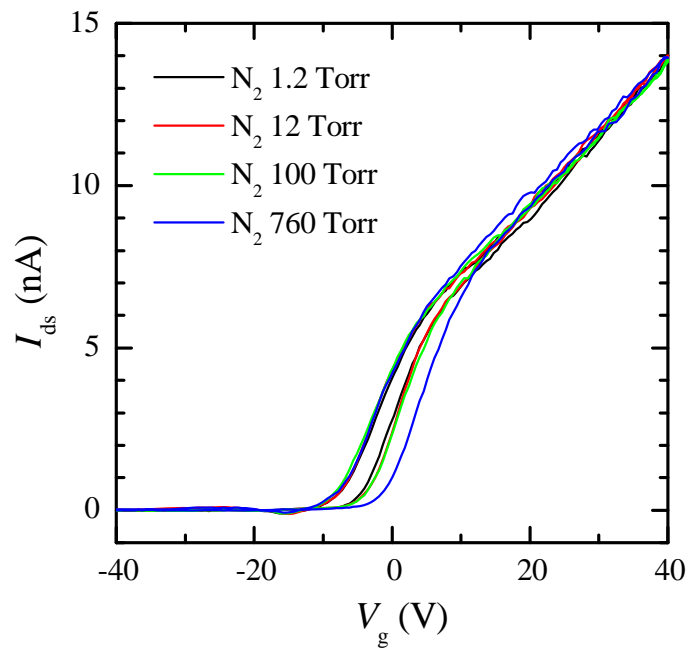

**Figure S2.**  $I_{\text{ds}}-V_{\text{g}}$  curves for  $V_{\text{ds}} = 0.1$  V in dry nitrogen with varying values of pressure. The curves for pressures less than 100 Torr nearly coincide with each other. At 760 Torr, the increase in the hysteresis is observed.

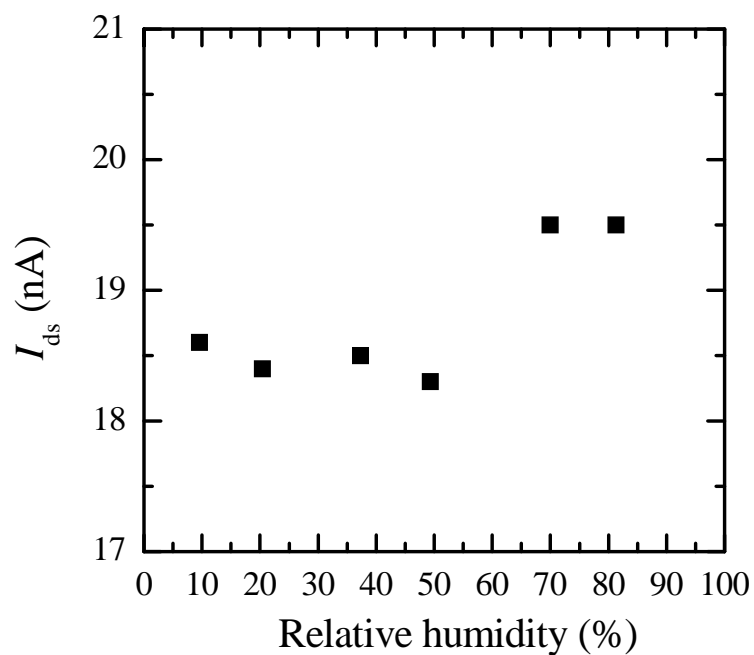

**Figure S3.**  $I_{ds}$  in the on-state ( $V_g = 40$  V and  $V_{ds} = 0.1$  V) measured under humid nitrogen condition at 760 Torr. The variation in the on-current is less than 10%.

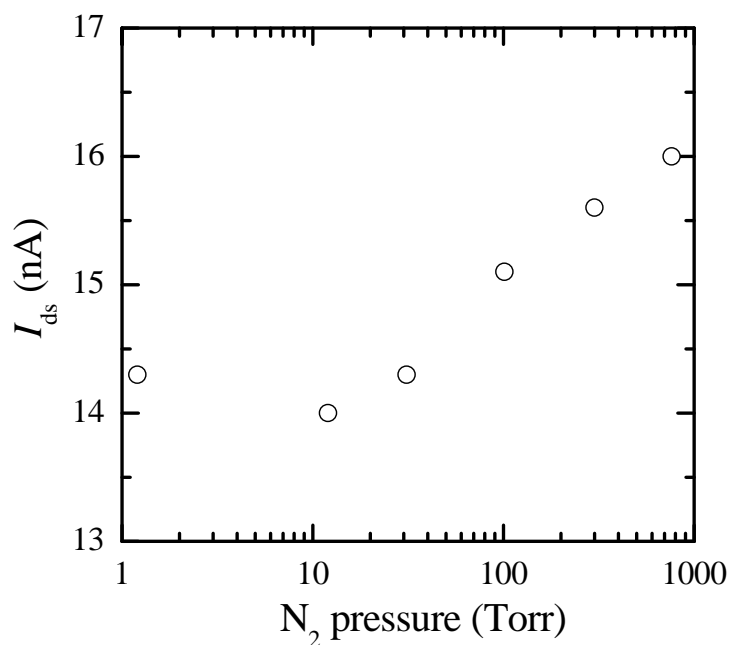

**Figure S4.**  $I_{ds}$  in the on-state ( $V_g = 40$  V and  $V_{ds} = 0.1$  V) measured under dry nitrogen condition with varying values of pressure. The on-current increases by 14% as the pressure increases from 1 to 760 Torr. The variation in the on-current shown in Figs. S3 and S4 can be attributed to the variations in temperature.
